# Supplementary material for: Reassessing pregnancy intention and its relation to maternal, perinatal and neonatal outcomes in a low-income setting: A cohort study
Source: PLoS One. 2018 Oct 18;13(10):e0205487. doi: 10.1371/journal.pone.0205487 (PMC6193645; doi:10.1371/journal.pone.0205487)
Supplement: S1 Table — (DOCX) [file pone.0205487.s001.docx]

| **Socio-demographic / economic** | **Parental anthropometry** | **Obstetric history** | **Antenatal factors** | **Delivery factors** | **Infant factors** | **Infant postnatal factors** |
| --- | --- | --- | --- | --- | --- | --- |
| Socio-economic status1 | Maternal height1 | Parity1 | ANC uptake1^ | Location2 | Sex1 | Weight at postnatal visit6 |
| Maternal age1 | Pre-pregnancy weight3 | Birth interval1 | Morbidity1+ | Person2 | Maternal estimate of size1 | Length at postnatal visit6 |
| Maternal education1 | Paternal height3 | History of LBW baby3 | Malaria3 |  | Multiple birth1 | Age at postnatal visit6 |
| Paternal education1 | Paternal weight3 | Number of live children2 | Gestational weight gain3 |  | Maternal estimate of gestation1 | Alive at postnatal visit6 |
| Marital status1 | Maternal birth weight3 | Caloric intake3 |  |  |
| Intimate partner violence1 | Maternal MUAC4 |  | Iron/folic acid use4 |  |  |  |
| Safe water1* |  |  | IPTp4 |  |  |  |
| Rural area1** |  |  | Smoking5 |  |  |  |
| Ethnicity5 |  |  | Alcohol5 |  |  |  |
| Previous depression2 |  |  | LMUP2 |  |  |  |
|  |  |  |  |  |  |  |
|  |  |  |  |  |  |  |
| **1 Measured and included** | **2 Relevant to main analysis** | **3 Data not collected** | **4 Proxy for data not collected** | **5 Not applicable** | **6Postnatal factors used in imputation model** | |
|  |  |  |  |  |  |  |
| * included in measure of SES | |  | ^ measured by months at booking and total attendances | | |  |
| ** cluster variable included, also captured in measure of SES | | | + reported antenatal problems (any, including malaria) and antenatal SRQ score | | | |
